# Supplementary material for: Imaging features for the prediction of clinical endpoints in chronic liver disease: a scoping review protocol
Source: HighWire-hosted journal article supplement (doi:10.1136/bmjopen-2021-053204), 2022-05-01
Supplement: bmjopen-2021-053204supp001_data_supplement.pdf [file bmjopen-2021-053204supp001_data_supplement.pdf]

"liver cirrhosis".sh.  
liver.tw.  
cirrhosis.tw.  
fibrosis.tw.  
3 or 4  
2 and 5  
"liver cirrhosis".tw.  
fibrosis.sh.  
chronic.tw.  
"liver diseases".sh.  
9 and 10  
diseases.tw.  
2 and 12  
"liver diseases".tw.  
disease.tw.  
"liver disease".tw.  
2 and 15  
11 or 13 or 14 or 16 or 17  
1 or 3 or 6 or 7 or 8 or 18  
"diagnostic imaging".sh.  
diagnostic.tw.  
imaging.tw.  
"diagnostic imaging".tw.  
ultrasound.tw.  
ultrasonography.sh.  
ultrasonography.tw.  
ultrasonics.sh.  
ultrasonics.tw.  
ultrasounds.tw.  
21 and 22  
20 or 23 or 30  
24 or 25 or 26 or 27 or 28 or 29  
"tomography, x ray computed".sh.  
tomography.tw.  
"x ray".tw.  
computed.tw.  
34 and 35 and 36  
"x ray computed tomography".tw.  
computerized.tw.  
computerised.tw.  
39 or 40  
34 and 41  
"computerized tomography".tw.  
"computerised tomography".tw.  
CT.tw.  
33 or 37 or 38 or 42 or 43 or 44 or 45  
"magnetic resonance imaging".sh.  
magnetic.tw.  
resonance.tw.  
48 and 49  
"magnetic resonance imaging".tw.  
47 or 50 or 51  
31 or 32 or 46 or 52  
"risk prediction model".tw.  
"predictive model".tw.  
"predictive equation".tw.  
"prediction model".tw.  
"risk calculator".af.  
"prediction rule".tw.  
"risk model".tw.  
"statistical model".tw.

"cox model".tw.  
"multivariable".tw.  
prognos\$.tw.  
54 or 55 or 56 or 57 or 58 or 59 or 60 or 61 or 62 or 63 or 64  
19 and 53 and 65  
limit 66 to english language  
limit 67 to human  
limit 68 to humans  
limit 69 to yr="1980 -Current"  
review.pt.  
bibliography.pt.  
editorial.pt.  
letter.pt.  
meta-analysis.pt.  
news.pt.  
71 or 72 or 73 or 74 or 75 or 76  
70 not 77
