# Supplementary material for: Imaging features for the prediction of clinical endpoints in chronic liver disease: a scoping review protocol
Source: HighWire-hosted journal article supplement (doi:10.1136/bmjopen-2021-053204), 2022-05-01
Supplement: bmjopen-2021-053204supp002_data_supplement.pdf [file bmjopen-2021-053204supp002_data_supplement.pdf]

Imaging features to predict clinical endpoints in chronic liver disease - ... [https://forms.office.com/Pages/ResponsePage.aspx?id=\\_oivH5ipW0y...](https://forms.office.com/Pages/ResponsePage.aspx?id=_oivH5ipW0y...)

# Imaging features to predict clinical endpoints in chronic liver disease - a scoping review

Study data entry proforma

...

**N.B.:** Please check that the study meets the inclusion criteria first!

If not, explain why in the final question, submit and email [m.chouhan@ucl.ac.uk](mailto:m.chouhan@ucl.ac.uk) with the study details.

1. Researcher initials:

2. DOI:

3. Author:

(e.g. Smith et al.)

Imaging features to predict clinical endpoints in chronic liver disease - ... [https://forms.office.com/Pages/ResponsePage.aspx?id=\\_oivH5ipW0y...](https://forms.office.com/Pages/ResponsePage.aspx?id=_oivH5ipW0y...)

4. Year:

(Format: YYYY)

The value must be a number

5. Country:

Enter your answer

6. Imaging modalities used:

US

CT

MRI

7. Study type

(n.b. prognostic studies only - if not prognostic, enter "not prognostic" in question 35 and submit blank form)

Retrospective

Prospective

Other

8. Recruitment setting:

Outpatient

Inpatient

Patient registry

Imaging features to predict clinical endpoints in chronic liver disease - ... [https://forms.office.com/Pages/ResponsePage.aspx?id=\\_oivH5ipW0y...](https://forms.office.com/Pages/ResponsePage.aspx?id=_oivH5ipW0y...)

Other

9. Prognostic study phase:

Phase Ia

Phase Ib

Phase IIa

Phase IIb

Phase III

Other

10. Overall sample size:

The value must be a number

11. Non-liver disease sub-cohort size:

*(i.e. healthy volunteers, non-liver disease patients, if no non-liver disease sub-cohort, just type "0")*

The value must be a number

12. Non-liver disease sub-cohort:

No non-liver disease sub-cohort studied

Healthy volunteers

Non-liver disease patients

Age-matched controls

Imaging features to predict clinical endpoints in chronic liver disease - ... [https://forms.office.com/Pages/ResponsePage.aspx?id=\\_oivH5ipW0y...](https://forms.office.com/Pages/ResponsePage.aspx?id=_oivH5ipW0y...)

Other

13. Liver disease sub-cohort size:

*(pooled across all liver disease aetiologies, if multiple)*

The value must be a number

14. Liver disease aetiologies studied:

Viral hepatitis

Alcoholic liver disease

NASH

NAFLD

PSC

PBC

Autoimmune hepatitis

Unspecified

Other

15. Development sample size:

*(for phase Ia studies only - if not applicable, enter '0')*

The value must be a number

16. Internal validation/test sample size:

*(for phase Ib studies and above only - if not applicable, enter '0')*

Imaging features to predict clinical endpoints in chronic liver disease - ... [https://forms.office.com/Pages/ResponsePage.aspx?id=\\_oivH5ipW0y...](https://forms.office.com/Pages/ResponsePage.aspx?id=_oivH5ipW0y...)

The value must be a number

17. Interval validation/test sampling method:

*(if no interval validation/test sample, just select 'N/A')*

- Random development/validation dataset split
- Re-sampling of the same data (e.g. bootstrap or cross-validation methods)
- N/A
- Other

18. External validation/test sample size:

*(for phase Ib studies and above only - if not applicable, enter '0')*

The value must be a number

19. External validation/test sample cohort notes:

*(3 details - disease aetiology - site (e.g. single, multiple) - separation from development cohort (e.g. random, temporal, geographic); if no external validation/test sample, just enter 'N/A'),*

*For example:*

*NAFLD - single site - geographic separation*

Enter your answer

20. Clinical endpoints:

*(include primary and secondary clinical endpoints)*

- Mortality/Survival
- Acute decompensation

Imaging features to predict clinical endpoints in chronic liver disease - ... [https://forms.office.com/Pages/ResponsePage.aspx?id=\\_oivH5ipW0y...](https://forms.office.com/Pages/ResponsePage.aspx?id=_oivH5ipW0y...)

- Hepatic encephalopathy
- Jaundice
- Intractable ascites
- Variceal bleed
- Development of HCC
- Deterioration in decompensation
- Transplant/Transplant free survival
- Other

21. Clinical endpoint sample size:

*(please enter sample size for each endpoint, each on a new line, in the box below)*

*For example:*

*Mortality, n=25*

*Acute decompensation, n=30*

Enter your answer

22. Follow-up interval (for the development cohort):

*(average/fixed, months)*

The value must be a number

23. Follow-up interval data-type (for the development cohort):

*(referring to question 22)*

- Mean
- Median
- Fixed

Imaging features to predict clinical endpoints in chronic liver disease - ... [https://forms.office.com/Pages/ResponsePage.aspx?id=\\_oivH5ipW0y...](https://forms.office.com/Pages/ResponsePage.aspx?id=_oivH5ipW0y...)

Other

24. Average follow-up interval (+/- limit or range, for the development cohort):  
(enter '0' if follow-up interval fixed)

Enter your answer

25. Average follow-up interval +/- limit data-type (for the development cohort):  
(referring to question 24)

Standard Deviation

Standard Error

Inter-quartile range

Range

Confidence Interval

N/A (fixed)

Other

26. Follow-up interval (for the test/validation cohort):  
(average/fixed, months)

The value must be a number

27. Follow-up interval data-type (for the test/validation cohort):  
(referring to question 26)

Mean

Median

Imaging features to predict clinical endpoints in chronic liver disease - ... [https://forms.office.com/Pages/ResponsePage.aspx?id=\\_oivH5ipW0y...](https://forms.office.com/Pages/ResponsePage.aspx?id=_oivH5ipW0y...)

Fixed

Other

28. Average follow-up interval +/- limit (for the test/validation cohort):

*(enter '0' if follow-up interval fixed)*

The value must be a number

29. Average follow-up interval +/- limit data-type (for the test/validation cohort):

*(referring to question 28)*

Standard Deviation

Standard Error

Inter-quartile range

Range

Confidence Interval

N/A (fixed)

Other

30. Number of scanners used:

*(if not stated, record 'not given')*

Enter your answer

31. Number of participating institutions/hospitals/imaging centres:

The value must be a number



Imaging features to predict clinical endpoints in chronic liver disease - ... [https://forms.office.com/Pages/ResponsePage.aspx?id=\\_oivH5ipW0y...](https://forms.office.com/Pages/ResponsePage.aspx?id=_oivH5ipW0y...)

### 32. Anatomical features evaluated 1:

*(thematic grouping)*

- Splenic size (single dimension/volumetry)
- Liver size (single dimension/volumetry)
- Porto-systemic shunts (single dimension/volumetry)
- Portal vein (diameter)
- Splenic vein (diameter)
- Liver contour (qualitative/quantitative)
- Liver radiomics/textural features
- Spleen radiomics/textural features
- Ascites (presence/volumetry)
- Fat (visceral/subcutaneous adiposity)
- Muscle (sarcopaenia)
- Other

### 33. Anatomical features evaluated 2:

*(specific variables measured from themes given previously)*

*For example:*

*splenic size - craniocaudal length (mm)*

*liver size - mid-clavicular line length (mm)*

*porto-systemic shunt - azygous vein diameter (mm)*

*porto-systemic shunt - presence of recanalised umbilical vein*

Enter your answer

### 34. Anatomical features linked with clinical endpoints 1:

*(thematic grouping)*

Imaging features to predict clinical endpoints in chronic liver disease - ... [https://forms.office.com/Pages/ResponsePage.aspx?id=\\_oivH5ipW0y...](https://forms.office.com/Pages/ResponsePage.aspx?id=_oivH5ipW0y...)

- Splenic size (single dimension/volumetry)
- Liver size (single dimension/volumetry)
- Porto-systemic shunts (single dimension/volumetry)
- Portal vein (diameter)
- Splenic vein (diameter)
- Liver contour (qualitative/quantitative)
- Liver radiomics/textural features
- Spleen radiomics/textural features
- Ascites (presence/volumetry)
- Fat (visceral/subcutaneous adiposity)
- Muscle (sarcopaenia)
- Other

### 35. Anatomical features linked with clinical endpoints 2:

*(list theme, then feature and hifen to separate endpoint associated with, new feature/linked endpoint on each line)*

*For example:*

*splenic size - spleen volume - acute decompensation*

*sarcopaenia - psoas muscle area at L3 - hepatic encephalopathy*

*visceral fat - L3 visceral fat area % - development of HCC*

Enter your answer

### 36. Statistical analysis method:

- Cox regression
- Regression
- t-tests

Imaging features to predict clinical endpoints in chronic liver disease - ... [https://forms.office.com/Pages/ResponsePage.aspx?id=\\_oivH5ipW0y...](https://forms.office.com/Pages/ResponsePage.aspx?id=_oivH5ipW0y...)

- Chi-squared tests
- Wilcoxon rank sum
- ANOVA
- Correlation
- ROC analysis
- Other

37. Prognostic model developed:

- Single variable
- > 1 variable/composite model
- Other

38. Prognostic model presentation

- Full regression formula (coefficients + intercept/baseline hazard)
- Partial regression formula (hazard/odds ratio, no intercept/baseline hazard)
- Sum score
- Nomogram
- Online tool
- Not given
- Other

39. Prognostic model usability

- Prognostic score/risk group assigned
- Time-to-endpoint presented for risk group/score

Imaging features to predict clinical endpoints in chronic liver disease - ... [https://forms.office.com/Pages/ResponsePage.aspx?id=\\_oivH5ipW0y...](https://forms.office.com/Pages/ResponsePage.aspx?id=_oivH5ipW0y...)

Data driven threshold/cut-off value

Instructions for clinical use given

Not given

Other

40. Additional notes (including why a study does not meet inclusion criteria):

*(please print as a PDF to save a copy of your completed proforma before hitting the 'submit' button)*

Enter your answer

Submit

Never give out your password. [Report abuse](#)

This content is created by the owner of the form. The data you submit will be sent to the form owner. Microsoft is not responsible for the privacy or security practices of its customers, including those of this form owner. Never
